# Supplementary material for: H2AFX modulates lung adenocarcinoma cell progression through the PPM1G-MAPK signaling axis
Source: Research Square preprint supplement (doi:10.21203/rs.3.rs-7067120/v1), 2025-08-12
Supplement: Supplementary file 1 [file e758112ccd1a91e08acff310.xlsx]

## Sheet: Sheet1
Supplementary Table 1. Oligonucleotides used in this study.
qPCR primers	Sequence
H2AFX forward primer	CGGCAGTGCTGGAGTACCTCA
H2AFX reverse primer	AGCTCCTCGTCGTTGCGGATG
PPM1G forward primer	TCCTGCTCTTCAGCCTCTGACA
PPM1G reverse primer	CTCACTGCTGTAGCCATCCTCT
β-actin forward primer	CACCATTGGCAATGAGCGGTTC
β-actin reverse primer	AGGTCTTTGCGGATGTCCACGT
siRNAs	Sequence (dT, deoxythymidine)
siNC-sense	GGCUCUAGAAAAGCCUAUGC(dTdT)
siNC-antisense	GCAUAGGCUUUUCUAGAGCC(dTdT)
siH2AFX-1-sense	CCAGGCCUCCCAGGAGUAC(dTdT)
siH2AFX-1antisense	GUACUCCUGGGAGGCCUGG(dTdT)
siH2AFX-2-sense	CGACAACAAGAAGACGCGA(dTdT)
siH2AFX-2antisense	UCGCGUCUUCUUGUUGUCG(dTdT)
siH2AFX-3-sense	CAACAAGAAGACGCGAAUC(dTdT)
siH2AFX-3antisense	GAUUCGCGUCUUCUUGUUG(dTdT)
siPPM1G-sense	CAGAGGAUGAAGUAGAACU(dTdT)
siPPM1Gantisense	AGUUCUACUUCAUCCUCUG(dTdT)
